# Supplementary material
Source: HighWire-hosted journal article supplement (https://erj.ersjournals.com/content/49/4/1601873)
Supplement: inline-supplementary-material-1 [file inline-supplementary-material-1.pdf]

## Online supplementary data

**Title: Bacteria-driven peribronchial lymphoid neogenesis in bronchiectasis and cystic fibrosis**

**Authors:** Justine Frija-Masson<sup>1,2,3</sup>, Clémence Martin<sup>1,2,3</sup>, Lucile Regard<sup>1,2,3</sup>, Marie-Noëlle Lothe<sup>1,2,3</sup>, Lhousseine Touqui<sup>3</sup>, Aurélie Durand<sup>1,4,5</sup>, Bruno Lucas<sup>1,4,5</sup>, Diane Damotte<sup>1,6</sup>, Marco Alifano<sup>1,7</sup>, Isabelle Fajac<sup>1,3,8</sup>, Pierre-Régis Burgel<sup>1,2,3</sup>

**Supplementary Table S1. Clinical characteristics of patients**

|                                              | <b>Control<br/>(n=17)</b> | <b>Bronchiectasis<br/>(n=8)</b> | <b>Cystic fibrosis<br/>(n=17)</b> |
|----------------------------------------------|---------------------------|---------------------------------|-----------------------------------|
| <b>Female, n (%)</b>                         | 11 (65%)                  | 6 (75%)                         | 8 (47%)                           |
| <b>Age, years (mean <math>\pm</math> SD)</b> | 67 $\pm$ 10               | 55 $\pm$ 16                     | 34 $\pm$ 9                        |
| <b>FEV<sub>1</sub>, % predicted</b>          | 100 $\pm$ 18              | 78 $\pm$ 35                     | 22 $\pm$ 6                        |
| <b>CFTR genotype, n</b>                      |                           |                                 |                                   |
| Phe508del / Phe508del                        | Unknown                   | Unknown                         | 10                                |
| Phe508del / Other                            | Unknown                   | Unknown                         | 5                                 |
| Other                                        | Unknown                   | Unknown                         | 2                                 |
| <b>Bronchial colonization*, n</b>            |                           |                                 |                                   |
| <i>P. aeruginosa</i>                         | 0                         | 4                               | 16                                |
| <i>S. aureus</i>                             | 0                         | 2                               | 16                                |
| <i>H. influenzae</i>                         | 0                         | 0                               | 0                                 |
| <i>S. maltophilia</i>                        | 0                         | 2                               | 0                                 |
| <i>A. xylosoxydans</i>                       | 0                         | 1                               | 1                                 |

\*, Some patients displayed colonization with two or more pathogens; FEV<sub>1</sub>: Forced expiratory volume in one second, CFTR: Cystic fibrosis transmembrane conductance regulator

**Supplementary Table S2. Primary antibodies used for immunohistochemical staining in human and in mouse lung sections**

| Antigen               | Source            | Manufacturer  | Reference  | Dilution | Unmasking         |
|-----------------------|-------------------|---------------|------------|----------|-------------------|
| <b>Human sections</b> |                   |               |            |          |                   |
| Human CD20            | Mouse monoclonal  | Dako          | M0755      | 1:200    | Citrate microwave |
| Human CD3             | Rabbit polyclonal | Dako          | A0452      | 1:200    | Citrate microwave |
| Human FDC             | Mouse monoclonal  | Dako          | M7157      | 1:50     | Citrate microwave |
| Human PNAd            | Rat monoclonal    | Santa Cruz    | sc19602    | 1:50     | None              |
| Human PCNA            | Rabbit polyclonal | Calbiochem    | PC474      | 1:200    | None              |
| Human CXCL12          | Rabbit polyclonal | Santa Cruz    | Sc28876    | 1:50     | Citrate microwave |
| Human CXCL13          | Goat polyclonal   | R&D           | AF801      | 1:50     | Citrate microwave |
| Mouse IL-17A          | Rabbit polyclonal | Santa Cruz    | sc7927     | 1:50     | None              |
| <b>Mouse sections</b> |                   |               |            |          |                   |
| Mouse CD20            | Goat polyclonal   | Santa Cruz    | sc7735     | 1:250    | None              |
| Mouse CD3             | Rat monoclonal    | Santa Cruz    | sc101442   | 1:200    | Protease          |
| Mouse FDC             | Rat monoclonal    | BD Pharmingen | Antigen M1 | 1:50     | Protease          |
| Mouse PNAd            | Rat monoclonal    | BD Pharmingen | 553863     | 1:50     | None              |
| Mouse PCNA            | Rabbit polyclonal | Calbiochem    | PC474      | 1:200    | Protease          |
| Mouse CXCL12          | Rabbit polyclonal | Santa Cruz    | sc28876    | 1:50     | Citrate microwave |
| Mouse CXCL13          | Goat polyclonal   | R&D           | AF470      | 1:20     | Citrate microwave |
| Mouse IL-17A          | Rabbit polyclonal | Santa Cruz    | sc7927     | 1:50     | None              |

**Supplementary Table S3. Identification of lymphoid and myeloid cell populations by flow cytometry in the bronchoalveolar lavage.**

| <b>Cell Subset</b>      | <b>Phenotype</b>                                                                                                 |
|-------------------------|------------------------------------------------------------------------------------------------------------------|
| Granulocytes            | CD45 <sup>+</sup> CD11b <sup>+</sup> CD11c <sup>+</sup> NK1.1 <sup>-</sup> Ly-6G <sup>+</sup>                    |
| Monocytes/Macrophages   | CD45 <sup>+</sup> CD11b <sup>+</sup> CD11c <sup>-</sup> NK1.1 <sup>-</sup> Ly-6G <sup>-</sup> Ly-6C <sup>-</sup> |
| CD4 <sup>+</sup> Tcells | CD45 <sup>+</sup> CD4 <sup>+</sup> CD8 <sup>-</sup> TCRβ <sup>+</sup>                                            |
| CD8 <sup>+</sup> Tcells | CD45 <sup>+</sup> CD4 <sup>-</sup> CD8 <sup>+</sup> TCRβ <sup>+</sup>                                            |
| γδ T cells              | CD45 <sup>+</sup> CD4 <sup>-</sup> TCRγδ <sup>+</sup>                                                            |
| Myeloid dendritic cells | CD45 <sup>+</sup> CD11b <sup>+</sup> CD11c <sup>+</sup> Ly-6C <sup>-</sup>                                       |
| B cells                 | CD45 <sup>+</sup> CD19 <sup>+</sup>                                                                              |

**Supplementary Table S4. Antibodies used for detection of myeloid and lymphoid cells by flow cytometry in the bronchoalveolar lavage**

| <b>Antibodies used for detection of myeloid cells</b>  |                     |                  |                 |
|--------------------------------------------------------|---------------------|------------------|-----------------|
| <b>Antigen</b>                                         | <b>Manufacturer</b> | <b>Reference</b> | <b>Dilution</b> |
| Ly6C biotinylated                                      | BD Pharmingen       | 557359           | 1:100           |
| SAV PB                                                 | Invitrogen          | S11222           | 1:600           |
| CD11b APC                                              | eBioscience         | 170112832        | 1:200           |
| CD11c PE Cy7                                           | BD Pharmingen       | 558079           | 1:100           |
| NK1.1 PE                                               | BD Pharmingen       | 557391           | 1:100           |
| Ly6G FITC                                              | BD Pharmingen       | 551460           | 1:100           |
| CD45 Pcp Cy5.5                                         | BD Pharmingen       | 550994           | 1:100           |
| <b>Antibodies used for detection of lymphoid cells</b> |                     |                  |                 |
| <b>Antigen</b>                                         | <b>Manufacturer</b> | <b>Reference</b> | <b>Dilution</b> |
| TCRβ biotinylated                                      | BD Pharmingen       | 553169           | 1:100           |
| SAV PE Cy7                                             | BD Pharmingen       | 557598           | 1:100           |
| CD4 PB                                                 | BD Pharmingen       | 558107           | 1:100           |
| CD8 APC H7                                             | MACS                | 130096602        | 1:50            |
| CD19 FITC                                              | BD Pharmingen       | 553785           | 1:100           |
| NK1.1 Pcp Cy5.5                                        | BD Pharmingen       | 551114           | 1:100           |
| TCRgd PE                                               | BD Pharmingen       | 553178           | 1:100           |
| CD45 APC                                               | BD Pharmingen       | 559864           | 1:100           |
